# Supplementary material
Source: Springer Nature journal article supplement (https://www.springermedizin.de/resource/supplementary/12974_2011_392_MOESM1_ESM.pdf/9601542)

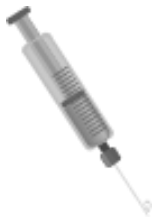

PT or No PT

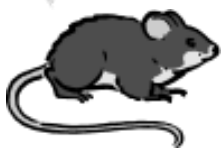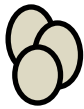

or

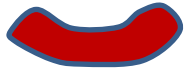

LNC

SPC

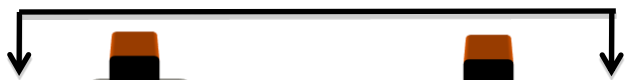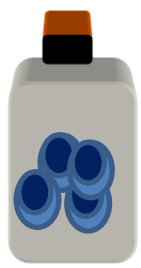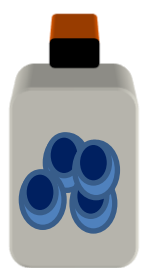

MOG<sub>p35-55</sub> + IL-2

MOG<sub>p35-55</sub> + IL-12

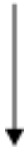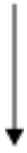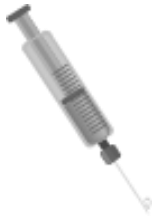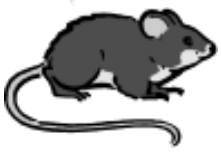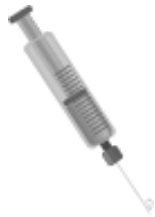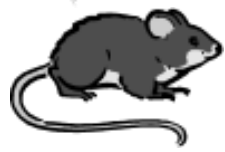

Supplement: MOESM1 [file 9601542]
